# Supplementary material
Source: PubMed Central journal article supplement (PMC4508455)
Supplement: JCM.00770-15_zjm999094426so1.pdf [file JCM.00770-15_zjm999094426so1.pdf]

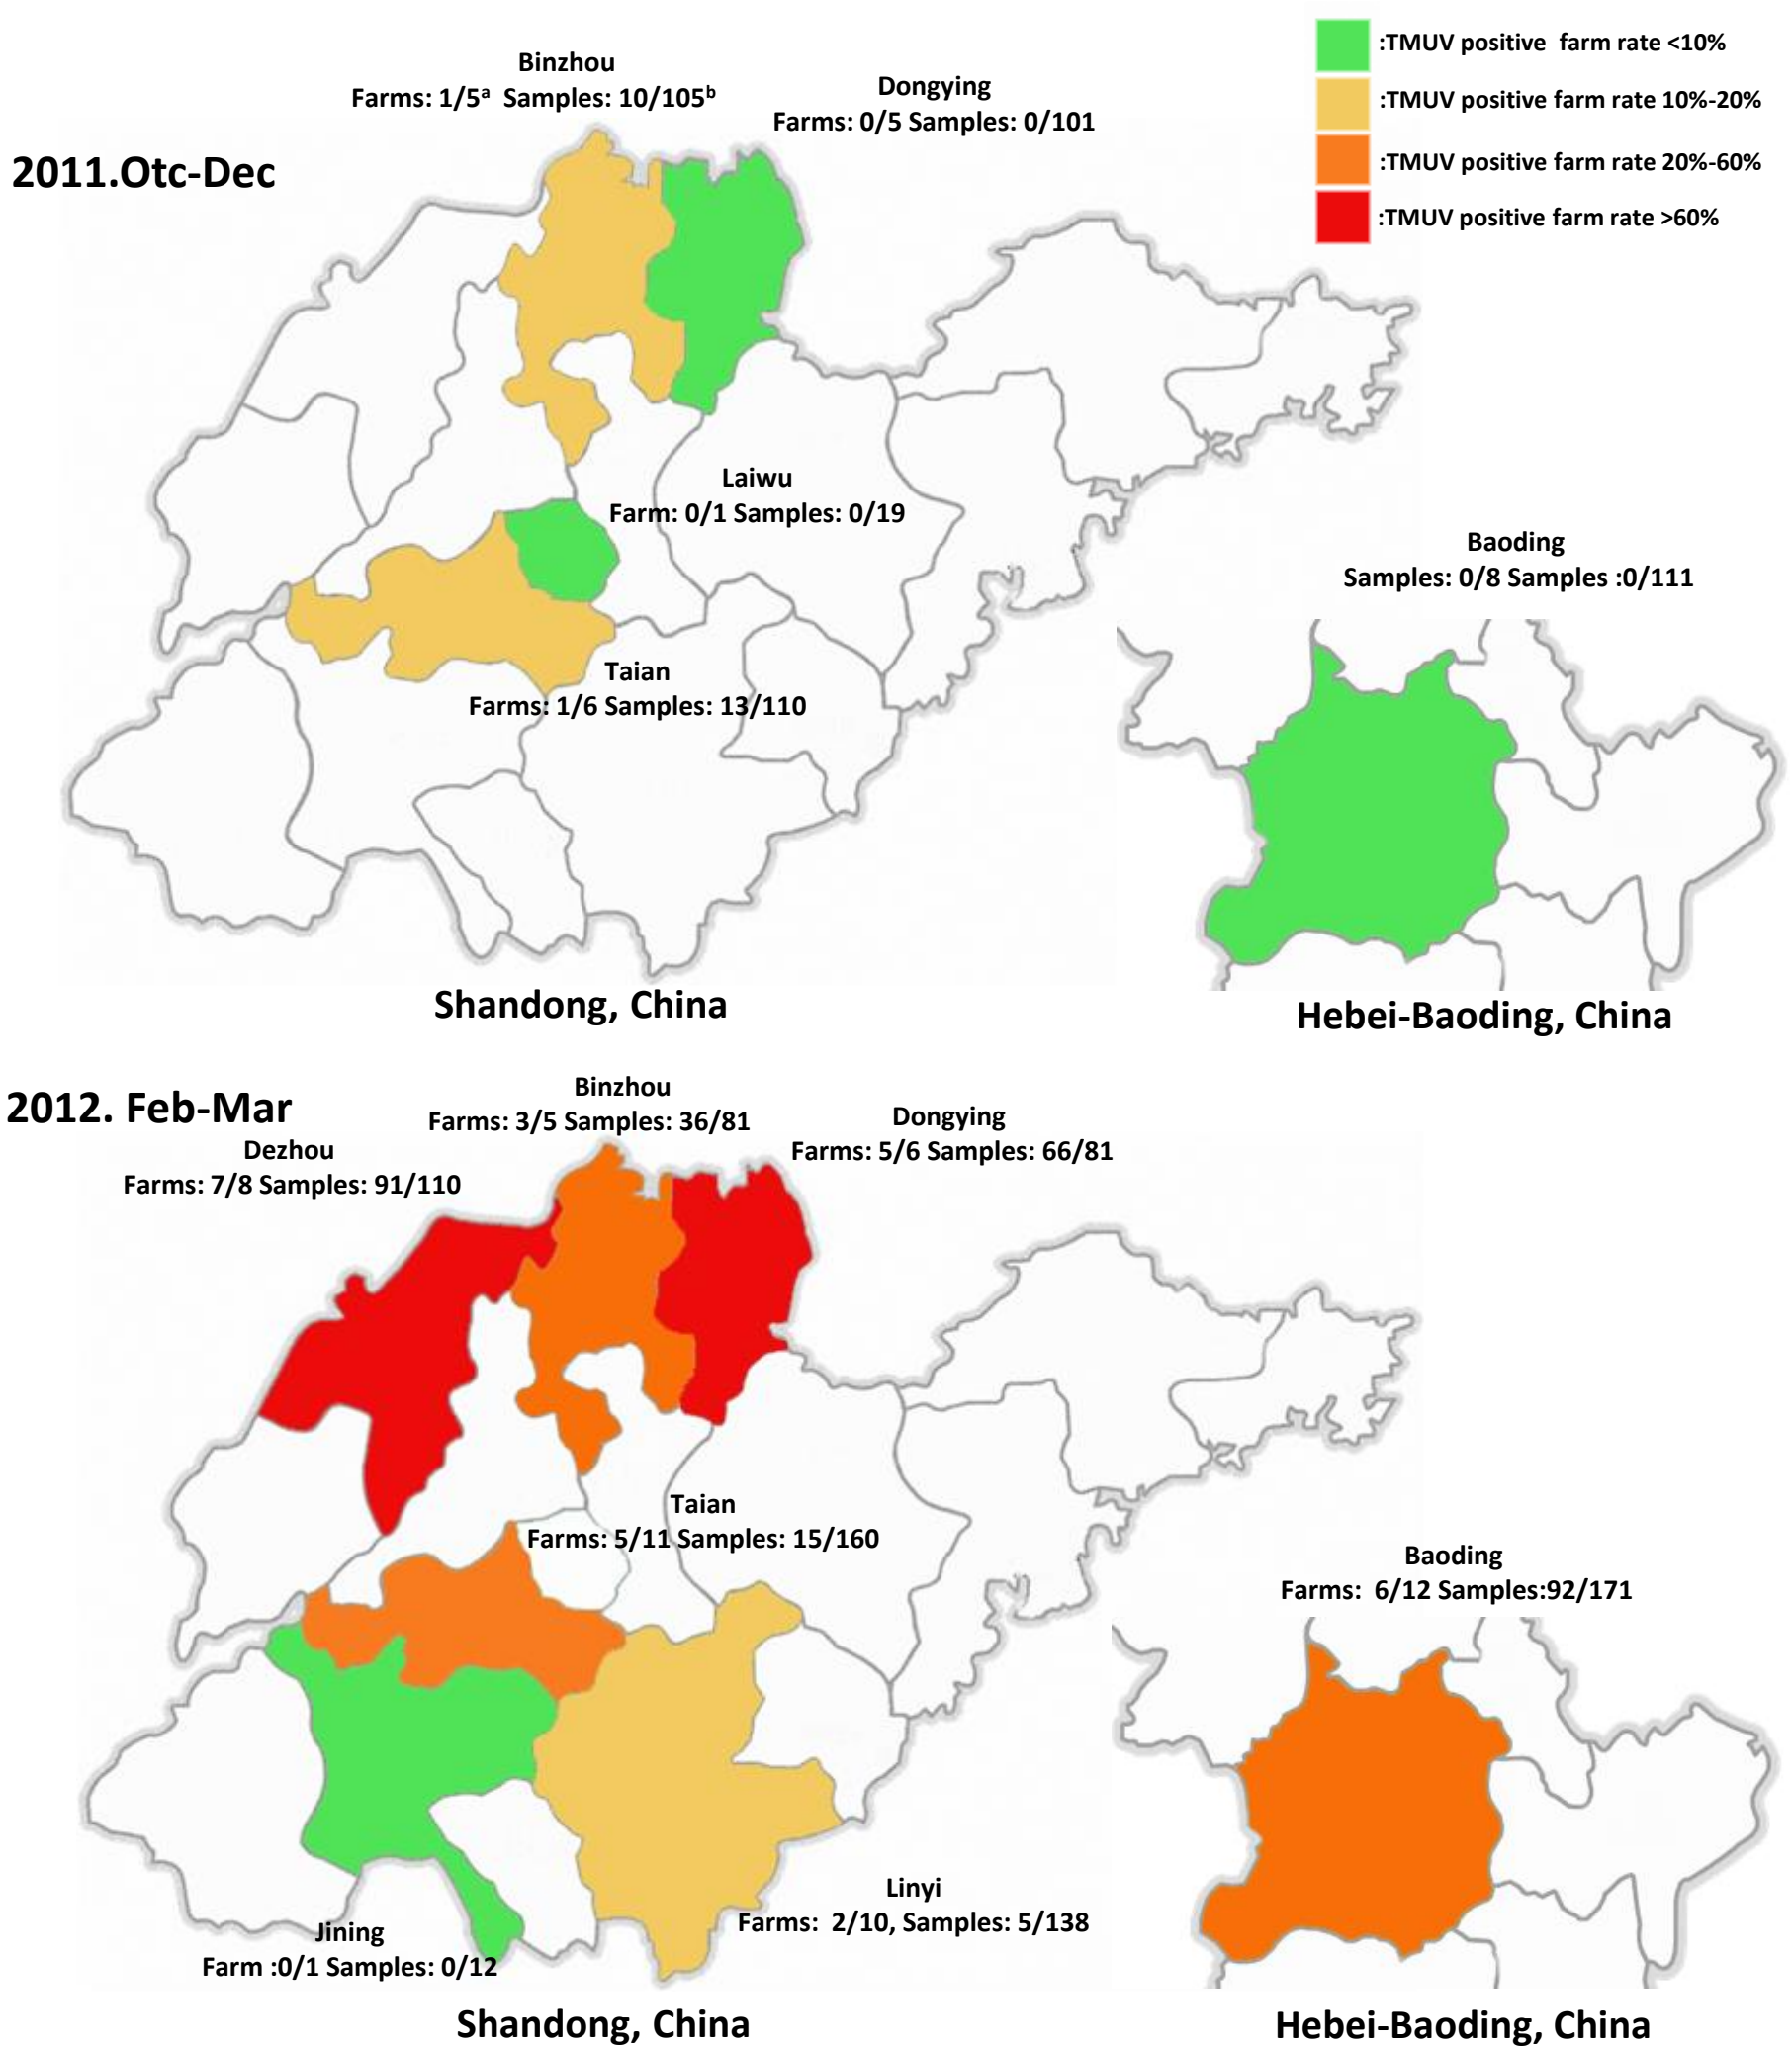

**Fig. S1.** Geographical locations and TMUV seropositivity rates of investigated farms in Shandong and Hebei provinces, China. a: one out of five investigated farms are positive for TMUV in Binzhou; b: 10 out of 105 collected sera samples are positive for TMUV in Binzhou.

I

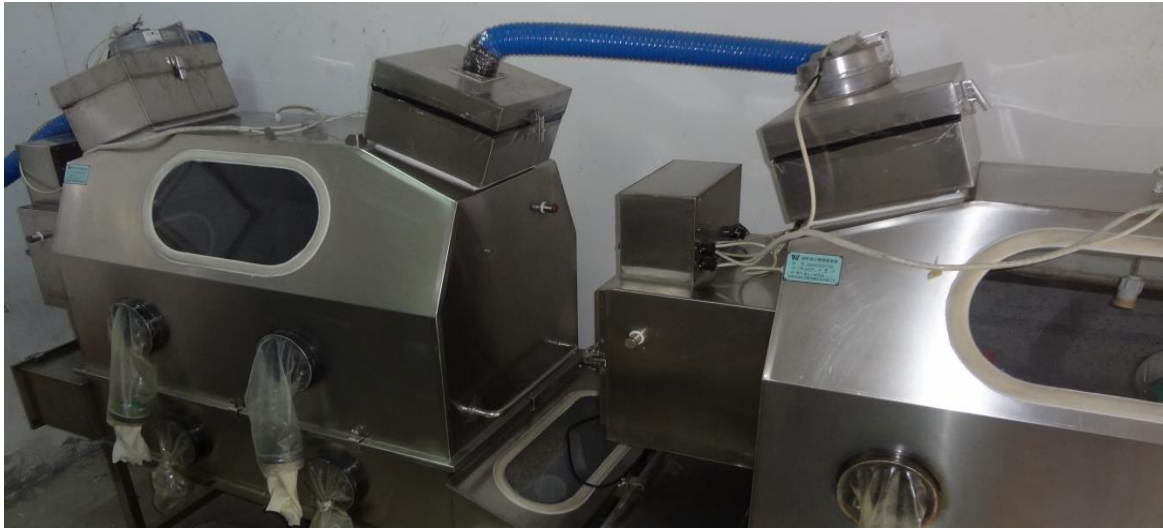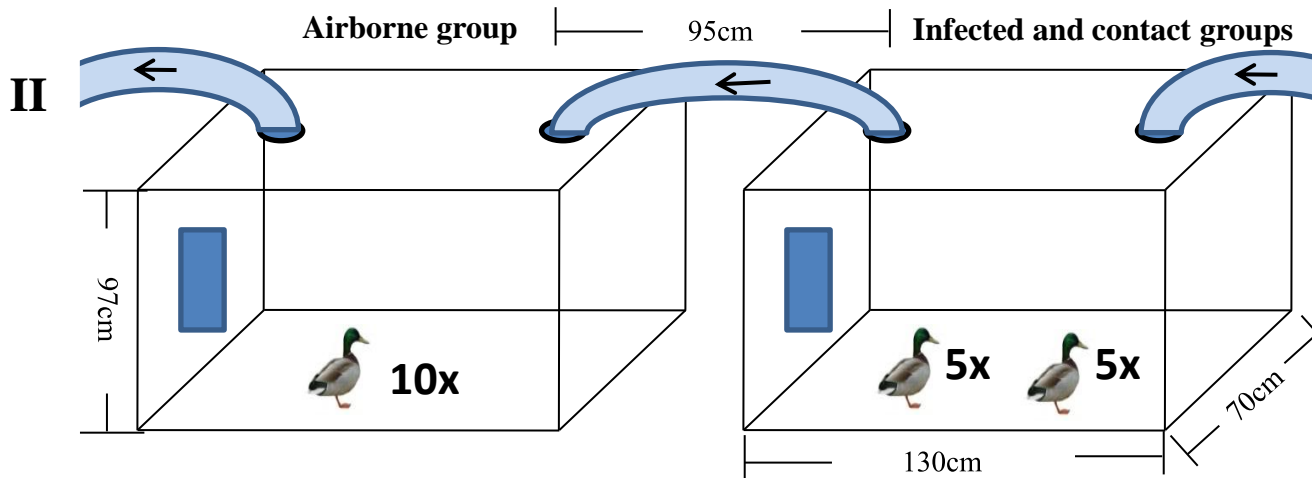

**Fig. S2.** Instruments used in the direct contact and airborne transmission experiment. Two isolators were connected with an air pipe (I) and the isolators are shown with their dimensions labeled (II). Airflow was maintained under negative pressure.
